# Supplementary material
Source: Springer Nature journal article supplement (https://www.springermedizin.de/resource/supplementary/13017_2010_102_MOESM1_ESM.pdf/9635640)

## treatment options for OLCC

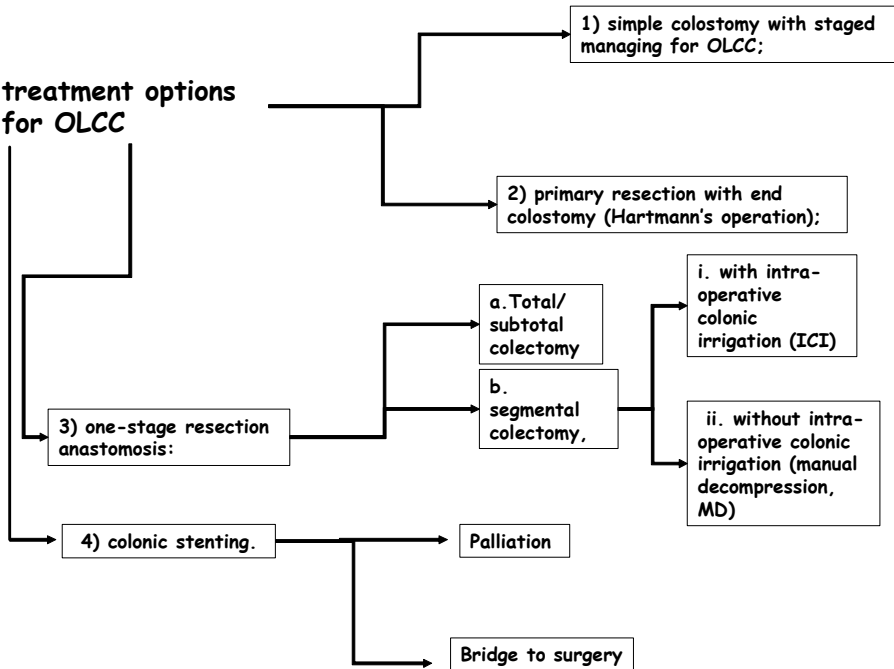

Supplement: MOESM1 [file 9635640]
